# Supplementary material for: Seasonal Variation in Human Gut Microbiome Composition
Source: PLoS One. 2014 Mar 11;9(3):e90731. doi: 10.1371/journal.pone.0090731 (PMC3949691; doi:10.1371/journal.pone.0090731)
Supplement: Table S1 — Sequencing summary by technical replicate and individual. Sequenced: total reads from all lanes sequenced per sample. Pass_QC: number of reads that are maintained after the read QC procedure (see methods). Subsampled: number of reads after randomly subsampling to a maximum 2 million reads per technical replicate (maximum 4 million reads per individual per season). Classified at level: indicates the number reads that were successfully classified at each taxonomic level ensuring no more than a 5% false classification rate. (XLS) [file pone.0090731.s011.xls]

## Sheet: legend
Table S1: Sequencing summary by technical replicate and individual. Sequenced: total reads from all lanes sequenced per sample. Pass_QC: number of reads that are maintained after the read QC procedure (see methods). Subsampled: number of reads after randomly subsampling to a maximum 2 million reads per technical replicate (maximum 4 million reads per individual per season). Classified at level: i…

## Sheet: tables
Table S1: 16S sequence reads and classification summary
Reads per replicate:				Classified at level:
	sequenced	pass_QC	subsampled	phylum	class	order	family	genus
mean	5225500	4579796	1990759	1872817	1758160	1756943	1465525	1086723
median	4681686	4185868	2000000	1945686	1822362	1821934	1493086	1108070
standard_deviation	2451945	2130892	64472	163941	194855	195268	252957	253750
maximum	15156780	12664259	2000000	1998930	1980731	1979568	1895591	1681605
minimum	1577277	1392803	1392803	1125286	1000096	991486	767605	481855
Reads per individual (replicates combined):				Classified at level:
	sequenced	pass_QC	subsampled	phylum	class	order	family	genus
mean	10451000	9159592	3981518	3745633	3516319	3513887	2931049	2173446
median	9694310	8409773	4000000	3879010	3647356	3646251	2975106	2219036
standard_deviation	3592392	2997861	100732	314867	377000	377807	493456	496434
maximum	23094917	19149708	4000000	3996690	3955692	3955262	3782660	3355118
minimum	3614185	3315082	3315082	2366578	2130497	2111819	1680628	1075911
