# Supplementary material for: Seasonal Variation in Human Gut Microbiome Composition
Source: PLoS One. 2014 Mar 11;9(3):e90731. doi: 10.1371/journal.pone.0090731 (PMC3949691; doi:10.1371/journal.pone.0090731)
Supplement: Table S3 — Paired metastats results (paired Wilcoxon rank sum test). This table contains raw P values for each taxa tested (by paired-metastats test, see methods), q-value, and average winter and summer abundances of each taxa tested. (XLSX) [file pone.0090731.s013.xlsx]

## Sheet: table
Table S3: Paired metastats results (Wilcoxon rank sum test)
taxa	P value	test	average winter abundance	average summer abundance	Q value
phylum_Acidobacteria	0.719671	fisher	1.50669e-07	1.375e-07	0.702046
phylum_Actinobacteria	0.00019996	wilcox.test	0.0383615	0.00996096	0.000805833
phylum_Bacteroidetes	0.00019996	wilcox.test	0.11207	0.30332	0.000805833
phylum_Caldiserica	0.498935	fisher	4.16667e-09	0	0.524157
phylum_Chlamydiae	1	fisher	0	4.16667e-09	0.837575
phylum_Chlorobi	1	fisher	0	4.16667e-09	0.837575
phylum_Chloroflexi	1.94561e-08	fisher	8.33333e-09	1.41667e-07	8.6961e-07
phylum_Cyanobacteria	0.427914	wilcox.test	2.77194e-06	1.13824e-06	0.524157
phylum_Deferribacteres	0.248936	fisher	8.33333e-09	0	0.33401
phylum_Deinococcus-Thermus	0.00059988	wilcox.test	1.05499e-06	3.3358e-07	0.00195321
phylum_Firmicutes	0.00019996	wilcox.test	0.715954	0.572238	0.000805833
phylum_Fusobacteria	0.873425	wilcox.test	0.00339959	0.00365945	0.83061
phylum_Gemmatimonadetes	0.000118734	fisher	5.41667e-08	0	0.000805833
phylum_Lentisphaerae	0.00019996	wilcox.test	9.25877e-06	0.000169513	0.000805833
phylum_Nitrospira	1	fisher	4.16667e-09	4.16667e-09	0.837575
phylum_OP10	1	fisher	4.16667e-09	4.16667e-09	0.837575
phylum_Planctomycetes	0.22852	fisher	8.33674e-08	5.41667e-08	0.317383
phylum_Proteobacteria	0.0441912	wilcox.test	0.0295489	0.0370272	0.082927
phylum_Spirochaetes	0.00519896	wilcox.test	1.96247e-05	0.000144721	0.0127805
phylum_SR1	0.00624581	fisher	4.16667e-08	4.16667e-09	0.0151271
phylum_Synergistetes	0.10038	wilcox.test	8.79747e-06	1.89216e-05	0.162344
phylum_Tenericutes	0.806639	wilcox.test	1.83333e-07	3.66667e-07	0.774589
phylum_Thermotogae	1	fisher	4.16667e-09	8.33333e-09	0.837575
phylum_TM7	0.00019996	wilcox.test	8.61299e-06	3.9407e-06	0.000805833
phylum_Verrucomicrobia	0.679664	wilcox.test	0.027637	0.0278456	0.674305
class_Acidobacteria_Gp1	1	fisher	8.33333e-09	8.33333e-09	0.837575
class_Acidobacteria_Gp2	1	fisher	0	4.16667e-09	0.837575
class_Acidobacteria_Gp3	1	fisher	0	4.16667e-09	0.837575
class_Acidobacteria_Gp4	1	fisher	8.81694e-08	9.16667e-08	0.837575
class_Actinobacteria	0.00019996	wilcox.test	0.0352418	0.00940675	0.000805833
class_Alphaproteobacteria	0.00019996	wilcox.test	8.70133e-06	4.14045e-06	0.000805833
class_Anaerolineae	0.498935	fisher	4.16667e-09	0	0.524157
class_Bacilli	0.00019996	wilcox.test	0.0162714	0.00497688	0.000805833
class_Bacteroidia	0.00019996	wilcox.test	0.108131	0.291457	0.000805833
class_Betaproteobacteria	0.00119976	wilcox.test	0.00893074	0.0157308	0.00344953
class_Clostridia	0.00239952	wilcox.test	0.560513	0.470684	0.00641163
class_Cyanobacteria	0.00779844	wilcox.test	6.30505e-07	4.58333e-08	0.0178333
class_Deferribacteres	0.498935	fisher	4.16667e-09	0	0.524157
class_Deinococci	0.00039992	wilcox.test	1.05083e-06	3.29413e-07	0.00143521
class_Deltaproteobacteria	0.00019996	wilcox.test	0.00454159	0.00671822	0.000805833
class_Epsilonproteobacteria	0.00039992	wilcox.test	4.23651e-06	4.68873e-05	0.00143521
class_Erysipelotrichi	0.00019996	wilcox.test	0.0147489	0.00873334	0.000805833
class_Flavobacteria	0.00019996	wilcox.test	4.35401e-06	1.88407e-06	0.000805833
class_Fusobacteria	0.893821	wilcox.test	0.00338831	0.00363482	0.837575
class_Gammaproteobacteria	0.211958	wilcox.test	0.0114209	0.00983372	0.298597
class_Gemmatimonadetes	0.00769679	fisher	2.91667e-08	0	0.0178333
class_Holophagae	1	fisher	8.33333e-09	8.33333e-09	0.837575
class_Lentisphaeria	0.00019996	wilcox.test	8.78793e-06	0.000162804	0.000805833
class_Mollicutes	0.0784756	fisher	1.375e-07	2.08333e-07	0.134906
class_Negativicutes	0.465507	wilcox.test	0.0745627	0.0522613	0.524157
class_Nitrospira	1	fisher	0	4.16667e-09	0.837575
class_Opitutae	0.00139972	wilcox.test	1.28557e-06	3.87083e-05	0.00395507
class_Planctomycetacia	0.68942	fisher	5.42007e-08	4.58333e-08	0.674305
class_Spartobacteria	0.000122121	fisher	0	5.83333e-08	0.000805833
class_Sphingobacteria	0.14917	wilcox.test	2.94508e-06	3.25368e-06	0.218927
class_Spirochaetes	0.0421916	wilcox.test	2.43144e-06	1.33375e-05	0.0800918
class_Synergistia	0.107978	wilcox.test	8.77654e-06	1.88507e-05	0.172365
class_Thermomicrobia	1.19358e-07	fisher	0	1e-07	3.66771e-06
class_Thermotogae	1	fisher	4.16667e-09	8.33333e-09	0.837575
class_Verrucomicrobiae	0.614677	wilcox.test	0.0271535	0.027666	0.624567
order_Acholeplasmatales	5.21996e-05	fisher	5e-08	1.75e-07	0.000805833
order_Acidimicrobiales	0.0922947	fisher	1.25e-08	4.16667e-08	0.153821
order_Actinomycetales	0.00039992	wilcox.test	0.000983165	0.000440282	0.00143521
order_Aeromonadales	0.0019996	wilcox.test	0.00403855	0.000152887	0.00543158
order_Alteromonadales	0.00182966	fisher	1.75034e-07	7.5e-08	0.00511116
order_Anaerolineales	0.498935	fisher	4.16667e-09	0	0.524157
order_Bacillales	0.00019996	wilcox.test	0.000451349	0.000195649	0.000805833
order_Bacteroidales	0.00019996	wilcox.test	0.108131	0.291457	0.000805833
order_Bdellovibrionales	0.823811	fisher	3.80101e-08	4.58333e-08	0.788
order_Bifidobacteriales	0.00019996	wilcox.test	0.0175499	0.00447185	0.000805833
order_Burkholderiales	0.00039992	wilcox.test	0.00887684	0.0153303	0.00143521
order_Campylobacterales	0.00019996	wilcox.test	4.21568e-06	4.68706e-05	0.000805833
order_Cardiobacteriales	0.496501	wilcox.test	1.18614e-06	9.9216e-07	0.524157
order_Caulobacterales	0.00019996	wilcox.test	1.82721e-06	3.08827e-07	0.000805833
order_Chromatiales	0.0981824	fisher	9.58333e-08	5.49022e-08	0.160372
order_Clostridiales	0.0039992	wilcox.test	0.560204	0.470522	0.0100318
order_Coriobacteriales	0.00019996	wilcox.test	0.0166786	0.00448671	0.000805833
order_Deferribacterales	0.498935	fisher	4.16667e-09	0	0.524157
order_Deinococcales	2.2471e-07	fisher	1.83556e-07	3.33333e-08	6.49883e-06
order_Desulfovibrionales	0.00019996	wilcox.test	0.00454145	0.00671794	0.000805833
order_Desulfuromonadales	0.773939	fisher	2.5e-08	2.08333e-08	0.744642
order_Enterobacteriales	0.407518	wilcox.test	0.00421415	0.00810479	0.512428
order_Erysipelotrichales	0.00019996	wilcox.test	0.0147489	0.00873334	0.000805833
order_Flavobacteriales	0.00019996	wilcox.test	4.35401e-06	1.88407e-06	0.000805833
order_Fusobacteriales	0.897221	wilcox.test	0.00338831	0.00363482	0.837575
order_Gemmatimonadales	0.00769679	fisher	2.91667e-08	0	0.0178333
order_Halanaerobiales	0.00320541	fisher	7.08333e-08	1.66667e-07	0.0084276
order_Holophagales	1	fisher	8.33333e-09	8.33333e-09	0.837575
order_Hydrogenophilales	0.076201	fisher	4.58674e-08	1.66667e-08	0.131455
order_Lactobacillales	0.00019996	wilcox.test	0.0158172	0.00478013	0.000805833
order_Legionellales	0.145147	fisher	3.50551e-08	1.25e-08	0.215324
order_Methylococcales	0.0309187	fisher	2.08333e-08	0	0.0610497
order_Methylophilales	0.00191601	fisher	3.75e-08	0	0.00529224
order_Mycoplasmatales	0.0159101	fisher	8.75e-08	3.33333e-08	0.0334286
order_Myxococcales	0.00738714	fisher	8.33333e-09	5.41667e-08	0.0175456
order_Natranaerobiales	0.498935	fisher	4.16667e-09	0	0.524157
order_Nautiliales	0.498935	fisher	4.16667e-09	0	0.524157
order_Neisseriales	0.0589882	wilcox.test	2.92269e-06	9.83604e-06	0.108622
order_Nitrosomonadales	0.000488587	fisher	1.25e-08	8.48045e-08	0.00171584
order_Nitrospirales	1	fisher	0	4.16667e-09	0.837575
order_Oceanospirillales	0.00019996	wilcox.test	1.11617e-06	4.25e-07	0.000805833
order_Opitutales	0.500002	fisher	0	8.33333e-09	0.524157
order_Pasteurellales	0.910218	wilcox.test	0.00240017	0.00112998	0.837575
order_Planctomycetales	0.68942	fisher	5.42007e-08	4.58333e-08	0.674305
order_Pseudomonadales	0.00019996	wilcox.test	0.000621999	0.000285343	0.000805833
order_Puniceicoccales	0.00139972	wilcox.test	1.18974e-06	3.85542e-05	0.00395507
order_Rhizobiales	0.00059988	wilcox.test	2.50788e-06	1.31544e-06	0.00195321
order_Rhodobacterales	0.0689862	wilcox.test	1.00853e-06	6.41667e-07	0.120703
order_Rhodocyclales	0.00079984	wilcox.test	1.55308e-06	3.10091e-05	0.00250476
order_Rhodospirillales	0.295541	wilcox.test	2.96431e-07	2.25e-07	0.38339
order_Rubrobacterales	0.498935	fisher	4.16667e-09	0	0.524157
order_Salinisphaerales	0.00019996	wilcox.test	8.06196e-07	5e-08	0.000805833
order_Selenomonadales	0.476905	wilcox.test	0.0745627	0.0522613	0.524157
order_Solirubrobacterales	0.00688676	fisher	1.00138e-07	3.33333e-08	0.0165167
order_Sphaerobacterales	1.19358e-07	fisher	0	1e-07	3.66771e-06
order_Sphingobacteriales	0.142771	wilcox.test	2.94508e-06	3.25368e-06	0.213357
order_Sphingomonadales	0.00039992	wilcox.test	2.80284e-06	1.35784e-06	0.00143521
order_Spirochaetales	0.0535893	wilcox.test	2.43144e-06	1.33375e-05	0.0994246
order_Synergistales	0.107778	wilcox.test	8.77654e-06	1.88507e-05	0.172365
order_Thermales	0.00059988	wilcox.test	8.67271e-07	2.9608e-07	0.00195321
order_Thermoanaerobacterales	0.00335631	fisher	4.84159e-08	4.16667e-09	0.00870468
order_Thermotogales	1	fisher	4.16667e-09	8.33333e-09	0.837575
order_Thiotrichales	0.687504	fisher	8.33333e-09	1.66667e-08	0.674305
order_Verrucomicrobiales	0.622076	wilcox.test	0.0271535	0.027666	0.624567
order_Vibrionales	0.179696	fisher	8.33333e-09	2.91667e-08	0.256828
order_Victivallales	0.00019996	wilcox.test	8.78793e-06	0.000162771	0.000805833
order_Xanthomonadales	0.0355929	wilcox.test	8.64691e-07	9.33333e-07	0.0683573
family_Acetobacteraceae	0.110239	fisher	2.42264e-07	1.75e-07	0.174275
family_Acholeplasmataceae	5.21996e-05	fisher	5e-08	1.75e-07	0.000805833
family_Acidaminococcaceae	0.143971	wilcox.test	0.0111796	0.00822259	0.214498
family_Acidimicrobiaceae	0.498935	fisher	4.16667e-09	0	0.524157
family_Actinomycetaceae	0.00019996	wilcox.test	0.000720484	0.000319922	0.000805833
family_Aerococcaceae	0.0833833	wilcox.test	9.55408e-05	5.17414e-05	0.140397
family_Aeromonadaceae	3.96537e-09	fisher	2.0675e-07	2.91667e-08	2.16622e-07
family_Alcaligenaceae	0.0127974	wilcox.test	6.99766e-07	1.325e-06	0.0280891
family_Alteromonadaceae	0.000476965	fisher	4.58333e-08	0	0.00168707
family_Anaerolineaceae	0.498935	fisher	4.16667e-09	0	0.524157
family_Aurantimonadaceae	0.00390689	fisher	0	3.75e-08	0.0098505
family_Bacillaceae	0.00019996	wilcox.test	2.30171e-06	1.13113e-06	0.000805833
family_Bacteriovoracaceae	0.301774	fisher	2.13434e-08	4.16667e-08	0.390446
family_Bacteroidaceae	0.00019996	wilcox.test	0.0640028	0.139287	0.000805833
family_Bdellovibrionaceae	0.217756	fisher	1.66667e-08	4.16667e-09	0.304151
family_Beijerinckiaceae	0.248936	fisher	8.33333e-09	0	0.33401
family_Beutenbergiaceae	0.498935	fisher	4.16667e-09	0	0.524157
family_Bifidobacteriaceae	0.00019996	wilcox.test	0.017507	0.00445697	0.000805833
family_Bogoriellaceae	3.83273e-11	fisher	4.16667e-09	1.66667e-07	3.76877e-09
family_Bradyrhizobiaceae	0.00019996	wilcox.test	9.51551e-07	2.75e-07	0.000805833
family_Brevibacteriaceae	0.00079984	wilcox.test	9.73962e-07	3.21569e-07	0.00250476
family_Brucellaceae	0.000889466	fisher	8.44812e-08	1.74022e-08	0.0027332
family_Burkholderiaceae	0.00019996	wilcox.test	9.22759e-07	1.20833e-07	0.000805833
family_Campylobacteraceae	0.00019996	wilcox.test	3.77313e-06	4.204e-05	0.000805833
family_Cardiobacteriaceae	0.261948	wilcox.test	1.1234e-06	8.83827e-07	0.347138
family_Carnobacteriaceae	0.00059988	wilcox.test	6.56919e-06	5.44069e-06	0.00195321
family_Caulobacteraceae	0.00019996	wilcox.test	1.02e-06	2.75494e-07	0.000805833
family_Cellulomonadaceae	0.0955607	fisher	5.25826e-08	2.08333e-08	0.157661
family_Chitinophagaceae	0.00079984	wilcox.test	1.33356e-06	3.79167e-07	0.00250476
family_Chloroplast	0.252949	wilcox.test	2.625e-07	0	0.33612
family_Chromatiaceae	1	fisher	4.16667e-09	4.16667e-09	0.837575
family_Clostridiaceae	0.00059988	wilcox.test	0.0154518	0.00862943	0.00195321
family_Comamonadaceae	0.0135973	wilcox.test	6.68058e-06	5.4804e-07	0.029712
family_Conexibacteraceae	0.0619693	fisher	1.83884e-08	0	0.11039
family_Coriobacteriaceae	0.00019996	wilcox.test	0.01653	0.00446557	0.000805833
family_Corynebacteriaceae	0.00019996	wilcox.test	2.01641e-05	8.72404e-06	0.000805833
family_Cryomorphaceae	0.500002	fisher	0	8.33333e-09	0.524157
family_Cyclobacteriaceae	0.0308905	fisher	1.66667e-08	5.83333e-08	0.0610497
family_Cystobacteraceae	1	fisher	0	4.16667e-09	0.837575
family_Cytophagaceae	0.541692	wilcox.test	2.13361e-07	3.20833e-07	0.563058
family_Deferribacteraceae	0.498935	fisher	4.16667e-09	0	0.524157
family_Deinococcaceae	8.76989e-09	fisher	1.6689e-07	1.66667e-08	4.31177e-07
family_Dermabacteraceae	0.14757	wilcox.test	3.18102e-07	2.09316e-07	0.21788
family_Dermacoccaceae	1	fisher	4.16667e-09	4.16667e-09	0.837575
family_Dermatophilaceae	0.500002	fisher	0	8.33333e-09	0.524157
family_Desulfomicrobiaceae	0.179696	fisher	8.33333e-09	2.91667e-08	0.256828
family_Desulfovibrionaceae	0.0009998	wilcox.test	0.00112585	0.00264059	0.00290863
family_Dietziaceae	0.0660203	fisher	6.25e-08	1.16667e-07	0.115926
family_Enterobacteriaceae	0.403319	wilcox.test	0.00401571	0.00782534	0.508448
family_Enterococcaceae	0.00839832	wilcox.test	0.000390292	5.87946e-05	0.0191162
family_Erysipelotrichaceae	0.00019996	wilcox.test	0.0147489	0.00873334	0.000805833
family_Erythrobacteraceae	0.0214872	fisher	4.16667e-09	3.75e-08	0.0442021
family_Eubacteriaceae	0.00639872	wilcox.test	0.00953385	0.00533684	0.0154214
family_Family_I	0.000955965	fisher	4.16667e-08	0	0.00290128
family_Flammeovirgaceae	0.0214872	fisher	4.16667e-09	3.75e-08	0.0442021
family_Flavobacteriaceae	0.00019996	wilcox.test	4.31126e-06	1.85074e-06	0.000805833
family_Fusobacteriaceae	0.95061	wilcox.test	0.00338578	0.00362953	0.837575
family_Gemmatimonadaceae	0.00769679	fisher	2.91667e-08	0	0.0178333
family_Geobacteraceae	0.547963	fisher	2.5e-08	1.66667e-08	0.567178
family_Geodermatophilaceae	0.461308	wilcox.test	1.08594e-06	4.58333e-08	0.524157
family_Halomonadaceae	0.00019996	wilcox.test	8.06355e-07	3.33333e-08	0.000805833
family_Helicobacteraceae	0.138372	wilcox.test	3.80048e-07	4.09314e-06	0.207414
family_Holophagaceae	1	fisher	8.33333e-09	8.33333e-09	0.837575
family_Hydrogenophilaceae	0.076201	fisher	4.58674e-08	1.66667e-08	0.131455
family_Hyphomicrobiaceae	0.568216	fisher	9.16667e-08	1.125e-07	0.585675
family_Iamiaceae	1	fisher	0	4.16667e-09	0.837575
family_Idiomarinaceae	0.500002	fisher	0	8.33333e-09	0.524157
family_Incertae_Sedis_XI	0.00859828	wilcox.test	4.65079e-05	3.17455e-05	0.0193032
family_Intrasporangiaceae	0.00359928	wilcox.test	3.25e-07	8.75e-08	0.00916897
family_Kineosporiaceae	0.0312521	fisher	0	2.5e-08	0.0612164
family_Lachnospiraceae	0.479304	wilcox.test	0.218436	0.225165	0.524157
family_Lactobacillaceae	0.00019996	wilcox.test	0.00042523	9.34124e-05	0.000805833
family_Legionellaceae	0.178763	fisher	2.58609e-08	8.33333e-09	0.256828
family_Leptospiraceae	0.687504	fisher	8.33333e-09	1.66667e-08	0.674305
family_Leptotrichiaceae	0.0961808	wilcox.test	1.69894e-06	2.69608e-06	0.157766
family_Leuconostocaceae	0.00039992	wilcox.test	9.15718e-05	4.97699e-05	0.00143521
family_Methylobacteriaceae	0.266147	wilcox.test	5.78485e-07	4.64707e-07	0.350811
family_Methylococcaceae	0.124203	fisher	1.25e-08	0	0.189061
family_Methylophilaceae	0.0619693	fisher	1.66667e-08	0	0.11039
family_Microbacteriaceae	0.0805839	wilcox.test	5.51033e-07	2.04167e-07	0.137092
family_Micrococcaceae	0.0159968	wilcox.test	0.000184359	7.0352e-05	0.0334678
family_Micromonosporaceae	0.625003	fisher	4.16667e-09	1.25e-08	0.624567
family_Moraxellaceae	0.00019996	wilcox.test	2.36828e-05	1.49289e-05	0.000805833
family_Mycobacteriaceae	1.41849e-05	fisher	1.67412e-07	4.16667e-08	0.00031524
family_Mycoplasmataceae	0.0159101	fisher	8.75e-08	3.33333e-08	0.0334286
family_Neisseriaceae	0.0817836	wilcox.test	2.88445e-06	9.67133e-06	0.138653
family_Nitrospiraceae	1	fisher	0	4.16667e-09	0.837575
family_Nocardiaceae	0.221109	fisher	1.04167e-07	7.08333e-08	0.30796
family_Nocardioidaceae	0.754049	wilcox.test	9.2215e-08	5.38971e-07	0.728356
family_Nocardiopsaceae	0.248936	fisher	8.42899e-09	0	0.33401
family_Oceanospirillaceae	0.662955	fisher	4.58333e-08	3.75e-08	0.659811
family_Opitutaceae	0.500002	fisher	0	8.33333e-09	0.524157
family_Oscillospiraceae	0.00779844	wilcox.test	0.0150921	0.0213406	0.0178333
family_Oxalobacteraceae	0.741652	wilcox.test	4.99995e-05	3.35167e-05	0.719207
family_Paenibacillaceae	0.622076	wilcox.test	2.91667e-07	1.45833e-07	0.624567
family_Pasteurellaceae	0.920816	wilcox.test	0.00239177	0.00112041	0.837575
family_Peptococcaceae	0.0821836	wilcox.test	1.14285e-06	1.16667e-06	0.138853
family_Peptostreptococcaceae	0.00039992	wilcox.test	0.0122599	0.0037851	0.00143521
family_Phyllobacteriaceae	0.0962659	fisher	2.08333e-08	5.41667e-08	0.157766
family_Planctomycetaceae	0.68942	fisher	5.42007e-08	4.58333e-08	0.674305
family_Planococcaceae	0.822635	wilcox.test	2.31717e-07	6.38971e-07	0.788
family_Porphyromonadaceae	0.00019996	wilcox.test	0.00663319	0.015811	0.000805833
family_Prevotellaceae	0.00019996	wilcox.test	0.0281777	0.117562	0.000805833
family_Promicromonosporaceae	0.000244227	fisher	0	5.41667e-08	0.000976226
family_Propionibacteriaceae	0.108633	fisher	2.93898e-08	8.33333e-09	0.172848
family_Pseudomonadaceae	0.00019996	wilcox.test	0.000505645	0.000216627	0.000805833
family_Pseudonocardiaceae	0.422959	fisher	3.3429e-08	2.08333e-08	0.524157
family_Psychromonadaceae	1	fisher	4.16667e-09	4.16667e-09	0.837575
family_Puniceicoccaceae	0.0009998	wilcox.test	5.66667e-07	2.14917e-05	0.00290863
family_Rhizobiaceae	1	fisher	4.16667e-09	8.33333e-09	0.837575
family_Rhodobacteraceae	0.127375	wilcox.test	9.16677e-07	6.125e-07	0.1921
family_Rhodocyclaceae	0.0325935	wilcox.test	6.32457e-08	5.16667e-07	0.0635905
family_Rhodospirillaceae	0.453537	fisher	3.75e-08	2.5e-08	0.524157
family_Rikenellaceae	0.00019996	wilcox.test	0.00585127	0.0112349	0.000805833
family_Rubrobacteraceae	0.498935	fisher	4.16667e-09	0	0.524157
family_Ruminococcaceae	0.0279944	wilcox.test	0.13464	0.10416	0.0568745
family_Salinisphaeraceae	1	fisher	4.16667e-09	4.16667e-09	0.837575
family_Shewanellaceae	0.850245	fisher	5.83674e-08	5.41667e-08	0.810133
family_Sinobacteraceae	0.0309187	fisher	2.08333e-08	0	0.0610497
family_Solirubrobacteraceae	0.209152	fisher	4.16667e-08	2.08333e-08	0.295492
family_Sphaerobacteraceae	1.19358e-07	fisher	0	1e-07	3.66771e-06
family_Sphingobacteriaceae	0.0341932	wilcox.test	9.97415e-07	7.82845e-07	0.0661862
family_Sphingomonadaceae	0.00079984	wilcox.test	2.51387e-06	1.18284e-06	0.00250476
family_Spirochaetaceae	0.0737852	wilcox.test	2.41328e-06	1.32792e-05	0.128187
family_Sporolactobacillaceae	0.625003	fisher	4.16667e-09	1.25e-08	0.624567
family_Staphylococcaceae	0.00019996	wilcox.test	6.6689e-06	5.61814e-06	0.000805833
family_Streptococcaceae	0.00019996	wilcox.test	0.0140944	0.00423424	0.000805833
family_Streptomycetaceae	0.452132	fisher	1.66667e-08	8.33333e-09	0.524157
family_Streptosporangiaceae	0.498935	fisher	4.16667e-09	0	0.524157
family_Succinivibrionaceae	0.0009998	wilcox.test	0.00362999	0.000127625	0.00290863
family_Sutterellaceae	0.14977	wilcox.test	0.00581297	0.00390219	0.219153
family_Synergistaceae	0.112777	wilcox.test	8.77654e-06	1.88507e-05	0.177717
family_Syntrophomonadaceae	0.119376	wilcox.test	1.76053e-07	3.54167e-07	0.187515
family_Thermaceae	0.00039992	wilcox.test	8.67271e-07	2.9608e-07	0.00143521
family_Thermoactinomycetaceae	0.248936	fisher	8.33333e-09	0	0.33401
family_Thermoanaerobacteraceae	0.0619693	fisher	1.66667e-08	0	0.11039
family_Thermotogaceae	1	fisher	4.16667e-09	8.33333e-09	0.837575
family_Trueperaceae	0.625003	fisher	4.16667e-09	1.25e-08	0.624567
family_Tsukamurellaceae	2.47787e-05	fisher	2.22045e-07	7.5e-08	0.000487304
family_Veillonellaceae	0.079784	wilcox.test	0.0632572	0.0439501	0.136677
family_Verrucomicrobiaceae	0.616477	wilcox.test	0.0271534	0.027666	0.624567
family_Vibrionaceae	0.179696	fisher	8.33333e-09	2.91667e-08	0.256828
family_Victivallaceae	0.00019996	wilcox.test	8.78793e-06	0.00016275	0.000805833
family_Xanthomonadaceae	0.15137	wilcox.test	7.14595e-07	8.70833e-07	0.220183
genus_Abiotrophia	0.104379	wilcox.test	7.44319e-05	4.28412e-05	0.168258
genus_Acetanaerobacterium	0.915417	wilcox.test	8.28103e-07	7.91667e-07	0.837575
genus_Acetivibrio	0.132374	wilcox.test	2.1226e-05	2.17675e-05	0.199029
genus_Acetobacter	0.0127593	fisher	4.61245e-08	8.33333e-09	0.0280891
genus_Acholeplasma	5.21996e-05	fisher	5e-08	1.75e-07	0.000805833
genus_Achromobacter	0.422959	fisher	3.33333e-08	2.08333e-08	0.524157
genus_Acidaminococcus	0.106579	wilcox.test	0.00191985	0.000944019	0.171242
genus_Acinetobacter	0.00019996	wilcox.test	1.89233e-05	8.98824e-06	0.000805833
genus_Actinobacillus	0.500002	fisher	0	8.33333e-09	0.524157
genus_Actinobaculum	0.00019996	wilcox.test	5.39204e-06	8.25247e-07	0.000805833
genus_Actinomyces	0.00019996	wilcox.test	0.000586785	0.000257619	0.000805833
genus_Adhaeribacter	0.124206	fisher	2.08333e-08	4.16667e-09	0.189061
genus_Adlercreutzia	0.00019996	wilcox.test	0.000596162	0.000193655	0.000805833
genus_Aerococcus	1.67388e-12	fisher	1.65944e-07	0	2.99161e-10
genus_Aeromicrobium	1.82542e-12	fisher	0	1.66667e-07	2.99161e-10
genus_Aeromonas	3.94262e-09	fisher	1.85534e-07	2.08333e-08	2.16622e-07
genus_Aggregatibacter	0.0805839	wilcox.test	3.80052e-07	1e-06	0.137092
genus_Agromyces	0.498935	fisher	4.16667e-09	0	0.524157
genus_Akkermansia	0.825835	wilcox.test	0.0199936	0.0249548	0.788402
genus_Alcaligenes	0.0154264	fisher	2.63392e-08	0	0.0328333
genus_Algoriphagus	0.0224647	fisher	8.33333e-09	4.58333e-08	0.0460206
genus_Alistipes	0.00019996	wilcox.test	0.00574345	0.0109129	0.000805833
genus_Allisonella	0.0143971	wilcox.test	0.000278285	0.000146564	0.0310458
genus_Allobaculum	0.726567	fisher	1.25e-08	2.15689e-08	0.70737
genus_Alloscardovia	0.00259948	wilcox.test	2.624e-06	9.83333e-07	0.00690839
genus_Amycolatopsis	0.498935	fisher	4.16667e-09	0	0.524157
genus_Anaerobiospirillum	0.341532	wilcox.test	1.09985e-05	1.19708e-05	0.437282
genus_Anaerococcus	0.00939812	wilcox.test	2.48868e-05	1.31925e-05	0.0210029
genus_Anaerofilum	0.0539892	wilcox.test	5.08643e-05	5.25628e-05	0.0997901
genus_Anaerofustis	0.00059988	wilcox.test	1.50501e-05	6.75076e-06	0.00195321
genus_Anaeroglobus	0.759048	wilcox.test	5.10131e-07	4.29167e-07	0.731747
genus_Anaerosporobacter	0.00019996	wilcox.test	2.875e-07	8.09316e-07	0.000805833
genus_Anaerostipes	0.00019996	wilcox.test	0.0128355	0.00406427	0.000805833
genus_Anaerotruncus	0.00339932	wilcox.test	0.00118742	0.000558856	0.00870468
genus_Anaerovibrio	1	fisher	0	4.16667e-09	0.837575
genus_Anaerovorax	0.589682	wilcox.test	2.16507e-05	2.15931e-05	0.605263
genus_Arcanobacterium	0.0195319	fisher	5.42623e-08	1.20833e-07	0.040519
genus_Arcobacter	0.011554	fisher	3.75e-08	4.16667e-09	0.0255882
genus_Arthrobacter	0.09876	fisher	4.42492e-08	8.70112e-08	0.160478
genus_Asticcacaulis	1.47471e-05	fisher	6.66667e-08	0	0.00031524
genus_Atopobium	0.00039992	wilcox.test	8.34393e-05	3.12606e-05	0.00143521
genus_Atopostipes	0.199556	fisher	7.54463e-08	4.58333e-08	0.283564
genus_Azospirillum	0.248936	fisher	8.33333e-09	0	0.33401
genus_Bacillariophyta	0.0619693	fisher	1.66667e-08	0	0.11039
genus_Bacteroides	0.00019996	wilcox.test	0.0615093	0.134923	0.000805833
genus_Barnesiella	0.0515897	wilcox.test	0.00060619	0.00145656	0.0964426
genus_Bdellovibrio	0.217756	fisher	1.66667e-08	4.16667e-09	0.304151
genus_Beijerinckia	0.498935	fisher	4.16667e-09	0	0.524157
genus_Bifidobacterium	0.00019996	wilcox.test	0.0167327	0.00427396	0.000805833
genus_Blastococcus	2.17591e-09	fisher	1.92665e-07	2.08333e-08	1.52829e-07
genus_Blastomonas	1	fisher	0	4.16667e-09	0.837575
genus_Blautia	0.00039992	wilcox.test	0.0523781	0.0270223	0.00143521
genus_Bosea	1.20524e-05	fisher	2.21715e-07	7.08333e-08	0.000282174
genus_Brachybacterium	0.0840371	fisher	1.87596e-07	1.28678e-07	0.141015
genus_Bradyrhizobium	0.00039992	wilcox.test	5.0878e-07	1.625e-07	0.00143521
genus_Brevibacillus	0.624203	fisher	8.33333e-09	4.16667e-09	0.624567
genus_Brevibacterium	0.00119976	wilcox.test	9.44604e-07	2.96569e-07	0.00344953
genus_Brevundimonas	0.0353214	fisher	8.00594e-08	3.554e-08	0.068102
genus_Bulleidia	0.326135	wilcox.test	7.375e-07	7.95833e-07	0.419755
genus_Butyricicoccus	0.00859828	wilcox.test	0.00972205	0.00653752	0.0193032
genus_Butyricimonas	0.00019996	wilcox.test	0.000582646	0.00142654	0.000805833
genus_Butyrivibrio	0.327471	fisher	1.55135e-07	1.20833e-07	0.420374
genus_Caldalkalibacillus	0.0309187	fisher	2.13116e-08	0	0.0610497
genus_Caloramator	0.498935	fisher	4.16667e-09	0	0.524157
genus_Campylobacter	0.00039992	wilcox.test	3.0523e-06	4.01976e-05	0.00143521
genus_Capnocytophaga	0.000835617	fisher	7.5e-08	1.25e-08	0.00260023
genus_Cardiobacterium	0.552689	wilcox.test	8.52039e-07	7.4412e-07	0.570869
genus_Carnobacterium	1	fisher	0	4.16667e-09	0.837575
genus_Catenibacterium	0.00019996	wilcox.test	0.000252754	9.74792e-05	0.000805833
genus_Catonella	0.452132	fisher	1.68898e-08	8.33333e-09	0.524157
genus_Caulobacter	0.624203	fisher	8.33333e-09	4.16667e-09	0.624567
genus_Cellulomonas	0.124206	fisher	2.25551e-08	4.16667e-09	0.189061
genus_Cellulosimicrobium	1	fisher	0	4.16667e-09	0.837575
genus_Cellvibrio	0.507821	fisher	1.25e-08	2.5e-08	0.530093
genus_Cerasicoccus	0.488302	wilcox.test	4.16667e-09	2.79167e-07	0.524157
genus_Cetobacterium	1.19358e-07	fisher	0	1e-07	3.66771e-06
genus_Chitinophaga	0.498935	fisher	4.16667e-09	0	0.524157
genus_Chryseobacterium	0.00019996	wilcox.test	1.7038e-06	8.36276e-07	0.000805833
genus_Citrobacter	1	fisher	5.02753e-09	8.33333e-09	0.837575
genus_Cloacibacillus	0.0657868	wilcox.test	8.5383e-06	1.84132e-05	0.115926
genus_Cloacibacterium	0.0295941	wilcox.test	6.46025e-07	8.40689e-08	0.0598771
genus_Clostridium	0.00019996	wilcox.test	0.00501078	0.00178299	0.000805833
genus_Collinsella	0.00019996	wilcox.test	0.00608548	0.00249534	0.000805833
genus_Conexibacter	0.498935	fisher	4.16667e-09	0	0.524157
genus_Coprobacillus	0.00019996	wilcox.test	0.000792386	0.000325862	0.000805833
genus_Coprococcus	0.0429914	wilcox.test	0.0116049	0.0155382	0.0812962
genus_Corynebacterium	0.00019996	wilcox.test	1.69127e-05	6.54928e-06	0.000805833
genus_Cronobacter	1	fisher	0	4.16667e-09	0.837575
genus_Cryptobacterium	0.00059988	wilcox.test	3.08819e-06	4.83333e-07	0.00195321
genus_Cytophaga	1	fisher	4.16667e-09	4.16667e-09	0.837575
genus_Deinococcus	7.31811e-10	fisher	1.58556e-07	8.33333e-09	5.99666e-08
genus_Denitrobacterium	1	wilcox.test	2.07302e-06	1.5e-07	0.837575
genus_Dermabacter	2.02644e-05	fisher	8.04103e-08	4.16667e-09	0.00041513
genus_Derxia	8.09498e-08	fisher	3.33333e-08	1.95833e-07	3.31663e-06
genus_Desemzia	1	fisher	4.16667e-09	4.16667e-09	0.837575
genus_Desulfomicrobium	1	fisher	0	4.16667e-09	0.837575
genus_Desulfosporosinus	0.498935	fisher	4.16667e-09	0	0.524157
genus_Desulfovibrio	0.00339932	wilcox.test	0.000233492	0.000651455	0.00870468
genus_Devosia	0.250003	fisher	0	1.25e-08	0.33401
genus_Dialister	0.00059988	wilcox.test	0.0380535	0.0269801	0.00195321
genus_Dietzia	0.000180149	fisher	1.66667e-08	1e-07	0.000805833
genus_Dolosigranulum	0.680464	wilcox.test	1.52939e-06	3.09951e-06	0.674305
genus_Dorea	0.00019996	wilcox.test	0.0236661	0.0120271	0.000805833
genus_Dyadobacter	0.507821	fisher	1.25e-08	2.5e-08	0.530093
genus_Dysgonomonas	0.124203	fisher	1.25e-08	0	0.189061
genus_Eggerthella	0.00339932	wilcox.test	0.000427637	0.000144076	0.00870468
genus_Empedobacter	6.36167e-05	fisher	1.45833e-07	3.75e-08	0.000805833
genus_Enhydrobacter	0.00079984	wilcox.test	1.1565e-06	6.79167e-07	0.00250476
genus_Enterococcus	0.00139972	wilcox.test	0.000355855	4.76363e-05	0.00395507
genus_Escherichia/Shigella	0.00779844	wilcox.test	5.43273e-07	2.34069e-07	0.0178333
genus_Ethanoligenens	0.498935	fisher	4.16667e-09	0	0.524157
genus_Eubacterium	0.00859828	wilcox.test	0.00663033	0.00385107	0.0193032
genus_Exiguobacterium	0.498935	fisher	4.16667e-09	0	0.524157
genus_Facklamia	0.606846	fisher	7.5e-08	6.25e-08	0.621583
genus_Faecalibacterium	0.0009998	wilcox.test	0.0143779	0.0213118	0.00290863
genus_Fastidiosipila	0.248936	fisher	8.33333e-09	0	0.33401
genus_Fervidobacterium	1	fisher	4.16667e-09	8.33333e-09	0.837575
genus_Filifactor	0.248936	fisher	8.55646e-09	0	0.33401
genus_Finegoldia	0.00059988	wilcox.test	2.64474e-05	6.4375e-06	0.00195321
genus_Flavobacterium	0.14857	wilcox.test	6.24124e-07	3.74511e-07	0.218699
genus_Fructobacillus	0.167753	fisher	6.66667e-08	3.75e-08	0.242579
genus_Fusobacterium	0.689862	wilcox.test	5.81165e-05	0.000257589	0.674305
genus_Gardnerella	0.34813	wilcox.test	5.75138e-07	1.58333e-07	0.442276
genus_Gemella	0.0019996	wilcox.test	5.62608e-06	2.91201e-06	0.00543158
genus_Gemmata	0.0154264	fisher	2.5e-08	0	0.0328333
genus_Gemmatimonas	0.00769679	fisher	2.91667e-08	0	0.0178333
genus_Geobacillus	1	fisher	4.16667e-09	4.16667e-09	0.837575
genus_Geobacter	0.452132	fisher	1.66667e-08	8.33333e-09	0.524157
genus_Georgenia	1.45959e-11	fisher	0	1.54167e-07	1.79404e-09
genus_Gillisia	1	fisher	0	4.16667e-09	0.837575
genus_Gordonia	0.0619693	fisher	1.66667e-08	0	0.11039
genus_Gordonibacter	0.00079984	wilcox.test	7.87464e-05	3.60007e-05	0.00250476
genus_Gp1	1	fisher	8.33333e-09	8.33333e-09	0.837575
genus_Gp2	1	fisher	0	4.16667e-09	0.837575
genus_Gp3	1	fisher	0	4.16667e-09	0.837575
genus_Gp4	0.11021	fisher	4.62796e-08	8.75e-08	0.174275
genus_GpI	0.00191601	fisher	3.75e-08	0	0.00529224
genus_Haemophilus	0.739852	wilcox.test	2.20056e-06	2.12647e-06	0.71888
genus_Hallella	0.0440732	fisher	8.33333e-08	1.5e-07	0.082927
genus_Halobacillus	0.498935	fisher	4.16667e-09	0	0.524157
genus_Halomonas	0.00019996	wilcox.test	3.21067e-07	2.5e-08	0.000805833
genus_Helcococcus	0.0988999	fisher	5.41667e-08	1e-07	0.160478
genus_Helicobacter	0.183963	wilcox.test	3.55048e-07	3.0473e-06	0.262164
genus_Hespellia	0.624203	fisher	8.33333e-09	4.16667e-09	0.624567
genus_Holdemania	0.0617876	wilcox.test	0.000329948	0.000234035	0.11039
genus_Holophaga	1	fisher	0	4.16667e-09	0.837575
genus_Howardella	0.00019996	wilcox.test	0.000860985	0.000433171	0.000805833
genus_Hydrocarboniphaga	0.0619693	fisher	1.66667e-08	0	0.11039
genus_Hydrogenoanaerobacterium	1	fisher	0	4.16667e-09	0.837575
genus_Hydrogenophilus	0.547963	fisher	2.5034e-08	1.66667e-08	0.567178
genus_Hymenobacter	0.31238	fisher	8.33333e-08	1.16667e-07	0.403106
genus_Hyphomicrobium	0.121306	fisher	7.08333e-08	3.75e-08	0.189061
genus_Jeotgalicoccus	0.498935	fisher	4.16667e-09	0	0.524157
genus_Johnsonella	0.452132	fisher	1.66667e-08	8.33333e-09	0.524157
genus_Jonquetella	1	fisher	5.41667e-08	5.83333e-08	0.837575
genus_Kineococcus	1	fisher	0	4.16667e-09	0.837575
genus_Kitasatospora	0.248936	fisher	8.33333e-09	0	0.33401
genus_Klebsiella	0.500002	fisher	0	9.0689e-09	0.524157
genus_Kocuria	0.288021	fisher	2.16942e-08	8.33333e-09	0.375617
genus_Lachnobacterium	0.00039992	wilcox.test	0.000885176	0.00032466	0.00143521
genus_Lactobacillus	0.0009998	wilcox.test	0.000197338	3.03157e-05	0.00290863
genus_Lactococcus	0.00019996	wilcox.test	0.00179655	0.000484283	0.000805833
genus_Lactonifactor	0.000902861	fisher	1.03443e-07	2.25e-07	0.00275713
genus_Legionella	0.498935	fisher	4.16667e-09	0	0.524157
genus_Leptotrichia	0.486503	wilcox.test	7.2523e-07	1.04608e-06	0.524157
genus_Leuconostoc	0.00059988	wilcox.test	7.26267e-05	3.51566e-05	0.00195321
genus_Lishizhenia	0.500002	fisher	0	8.33333e-09	0.524157
genus_Magnetospirillum	1	fisher	4.16667e-09	4.16667e-09	0.837575
genus_Mannheimia	1	fisher	0	4.16667e-09	0.837575
genus_Marinomonas	0.00769679	fisher	2.91667e-08	0	0.0178333
genus_Marmoricola	0.498935	fisher	4.16667e-09	0	0.524157
genus_Megamonas	0.0385923	wilcox.test	0.00214207	0.00293188	0.0738294
genus_Megasphaera	0.0009998	wilcox.test	0.00847744	0.0052011	0.00290863
genus_Methylobacterium	0.145401	fisher	2.24946e-07	1.625e-07	0.215324
genus_Micrococcus	0.0137972	wilcox.test	5.58983e-07	2.39707e-07	0.0300155
genus_Mitsuokella	0.00479904	wilcox.test	0.00128237	0.000786884	0.0118567
genus_Mobiluncus	0.585283	wilcox.test	4.54262e-07	1.05564e-06	0.602005
genus_Mogibacterium	0.00019996	wilcox.test	0.000538759	0.000145958	0.000805833
genus_Moraxella	0.00019996	wilcox.test	4.71209e-08	2.0375e-06	0.000805833
genus_Morganella	0.0312521	fisher	0	2.57356e-08	0.0612164
genus_Moryella	0.00279944	wilcox.test	1.78795e-06	1.09804e-06	0.0073998
genus_Mucilaginibacter	0.500002	fisher	0	8.33333e-09	0.524157
genus_Mucispirillum	0.498935	fisher	4.16667e-09	0	0.524157
genus_Mycobacterium	0.000591112	fisher	1.34079e-07	4.16667e-08	0.00195321
genus_Mycoplasma	0.000889466	fisher	8.33333e-08	1.66667e-08	0.0027332
genus_Neisseria	0.0341932	wilcox.test	4.89434e-07	7.70833e-07	0.0661862
genus_Nesterenkonia	1	fisher	0	4.16667e-09	0.837575
genus_Nocardia	0.500002	fisher	0	8.33333e-09	0.524157
genus_Nocardioides	1	fisher	5.42347e-08	5.90689e-08	0.837575
genus_Nocardiopsis	0.248936	fisher	8.42899e-09	0	0.33401
genus_Novosphingobium	0.439862	fisher	9.58333e-08	7.5e-08	0.524157
genus_Ochrobactrum	0.498935	fisher	4.26233e-09	0	0.524157
genus_Odoribacter	0.00019996	wilcox.test	0.000352691	0.000822794	0.000805833
genus_Olsenella	0.00019996	wilcox.test	0.000160388	4.61639e-05	0.000805833
genus_Opitutus	0.500002	fisher	0	8.33333e-09	0.524157
genus_Oribacterium	0.0279944	wilcox.test	6.54223e-05	6.4914e-05	0.0568745
genus_Ornithinimicrobium	0.500002	fisher	0	8.33333e-09	0.524157
genus_Oscillibacter	0.00559888	wilcox.test	0.00842191	0.0111395	0.0136952
genus_Oxalobacter	0.150739	fisher	6.69742e-08	3.40689e-08	0.219916
genus_Paenibacillus	0.000171267	fisher	2.20833e-07	8.75e-08	0.000805833
genus_Paludibacter	2.95572e-05	fisher	6.25e-08	0	0.000538222
genus_Papillibacter	4.17802e-07	fisher	4.16667e-09	1.08333e-07	1.14119e-05
genus_Parabacteroides	0.00019996	wilcox.test	0.00365324	0.00898695	0.000805833
genus_Paracoccus	0.289071	fisher	8.33333e-09	2.5e-08	0.375989
genus_Paraeggerthella	0.252549	wilcox.test	6.10417e-06	4.16667e-09	0.33612
genus_Parapedobacter	0.498935	fisher	4.16667e-09	0	0.524157
genus_Paraprevotella	0.00019996	wilcox.test	0.00181033	0.0049303	0.000805833
genus_Parascardovia	0.00624581	fisher	4.29738e-08	4.16667e-09	0.0151271
genus_Parasegetibacter	0.498935	fisher	4.16667e-09	0	0.524157
genus_Parasutterella	0.494501	wilcox.test	0.00530844	0.00326622	0.524157
genus_Parvimonas	0.030194	wilcox.test	5.64893e-05	2.66098e-05	0.0608404
genus_Pectobacterium	0.0154264	fisher	2.5e-08	0	0.0328333
genus_Pediococcus	0.414317	wilcox.test	8.64391e-07	2.03333e-06	0.519647
genus_Pedobacter	0.217756	fisher	1.75275e-08	4.16667e-09	0.304151
genus_Pedomicrobium	0.124203	fisher	1.25e-08	0	0.189061
genus_Peptococcus	0.245951	wilcox.test	7.71981e-07	1.04583e-06	0.33401
genus_Peptoniphilus	0.00019996	wilcox.test	5.20945e-05	3.40473e-05	0.000805833
genus_Peptostreptococcus	0.159768	wilcox.test	5.77658e-06	3.55541e-06	0.231714
genus_Peredibacter	0.26686	fisher	1.70811e-08	3.75e-08	0.350811
genus_Perlucidibaca	0.498935	fisher	4.16667e-09	0	0.524157
genus_Phascolarctobacterium	0.0905819	wilcox.test	0.00843928	0.00679865	0.15148
genus_Phenylobacterium	0.375006	fisher	4.16667e-09	1.66667e-08	0.473969
genus_Phocaeicola	0.250003	fisher	0	1.25e-08	0.33401
genus_Pirellula	0.498935	fisher	4.2007e-09	0	0.524157
genus_Porphyrobacter	1	fisher	4.16667e-09	8.33333e-09	0.837575
genus_Porphyromonas	0.74905	wilcox.test	2.3229e-05	1.83405e-05	0.724952
genus_Prevotella	0.00019996	wilcox.test	0.0232793	0.101588	0.000805833
genus_Prolixibacter	1	fisher	0	4.16667e-09	0.837575
genus_Promicromonospora	1	fisher	0	4.16667e-09	0.837575
genus_Propionibacterium	0.0697339	fisher	2.52231e-08	4.16667e-09	0.121579
genus_Prosthecobacter	0.498935	fisher	4.2007e-09	0	0.524157
genus_Proteiniphilum	0.498935	fisher	4.16667e-09	0	0.524157
genus_Proteocatella	0.498935	fisher	4.2007e-09	0	0.524157
genus_Proteus	0.0169966	wilcox.test	5.97346e-05	7.91667e-08	0.0354089
genus_Providencia	0.500002	fisher	0	8.33333e-09	0.524157
genus_Pseudidiomarina	1	fisher	0	4.16667e-09	0.837575
genus_Pseudomonas	0.00019996	wilcox.test	2.72146e-05	1.20309e-05	0.000805833
genus_Pseudonocardia	1	fisher	4.16667e-09	4.16667e-09	0.837575
genus_Pseudoramibacter	0.248936	fisher	8.33333e-09	0	0.33401
genus_Pseudorhodobacter	0.498935	fisher	4.16667e-09	0	0.524157
genus_Psychrilyobacter	0.0619693	fisher	1.66667e-08	0	0.11039
genus_Psychrobacter	0.000476049	fisher	7.91667e-08	1.25e-08	0.00168707
genus_Psychromonas	0.498935	fisher	4.16667e-09	0	0.524157
genus_Pyramidobacter	0.0409725	fisher	5.83333e-08	2.08333e-08	0.0780792
genus_Ralstonia	0.0009998	wilcox.test	2.96248e-07	9.58333e-08	0.00290863
genus_Raoultella	0.498935	fisher	4.16667e-09	0	0.524157
genus_Rhizobium	1	fisher	0	4.16667e-09	0.837575
genus_Rhodococcus	0.68942	fisher	5.41667e-08	4.58333e-08	0.674305
genus_Rhodopirellula	0.0625028	fisher	0	2.08333e-08	0.110539
genus_Robinsoniella	0.0524904	fisher	2.5034e-08	6.66667e-08	0.0977548
genus_Roseburia	0.363927	wilcox.test	0.0628463	0.0621636	0.461153
genus_Roseomonas	0.0156265	fisher	0	2.91667e-08	0.0331158
genus_Rothia	0.00479904	wilcox.test	0.000149203	5.30265e-05	0.0118567
genus_Rubellimicrobium	0.0955607	fisher	5e-08	2.08333e-08	0.157661
genus_Rubrobacter	0.498935	fisher	4.16667e-09	0	0.524157
genus_Ruminococcus	0.645871	wilcox.test	0.0213104	0.0175924	0.644111
genus_Salmonella	0.00019996	wilcox.test	3.75e-08	2.85834e-06	0.000805833
genus_Sandaracinobacter	0.124203	fisher	1.25e-08	0	0.189061
genus_Sarcina	7.98379e-16	fisher	2.08333e-07	0	3.92528e-13
genus_Scardovia	0.00019996	wilcox.test	2.57922e-05	6.48897e-06	0.000805833
genus_Schwartzia	0.0305417	fisher	5.42007e-08	1.66667e-08	0.0610497
genus_Sediminibacterium	0.00019996	wilcox.test	1.05439e-06	1.58333e-07	0.000805833
genus_Segetibacter	0.248936	fisher	8.33333e-09	0	0.33401
genus_Selenomonas	0.268146	wilcox.test	8.67511e-07	1.37304e-06	0.351563
genus_Serratia	0.00217653	fisher	1.20833e-07	4.16667e-08	0.0058797
genus_Sharpea	0.282673	fisher	2.01339e-07	1.58333e-07	0.369623
genus_Shewanella	1	fisher	1.66667e-08	2.08333e-08	0.837575
genus_Shuttleworthia	0.0931814	wilcox.test	6.62384e-07	2.33333e-07	0.154774
genus_Singulisphaera	0.624203	fisher	8.33333e-09	4.16667e-09	0.624567
genus_Skermanella	1	fisher	8.33333e-09	8.33333e-09	0.837575
genus_Slackia	0.00019996	wilcox.test	0.00249201	0.000442726	0.000805833
genus_Sneathia	0.936413	wilcox.test	3.16667e-07	1.2125e-06	0.837575
genus_Solirubrobacter	1	fisher	8.33333e-09	1.25e-08	0.837575
genus_Solitalea	0.124203	fisher	1.25e-08	0	0.189061
genus_Solobacterium	0.0141972	wilcox.test	3.14944e-05	2.22936e-05	0.0307495
genus_Sphaerobacter	3.81765e-06	fisher	0	7.91667e-08	9.38488e-05
genus_Sphingobacterium	0.00239952	wilcox.test	5.73362e-07	2.1054e-07	0.00641163
genus_Sphingomonas	0.00159968	wilcox.test	1.43322e-06	4.68873e-07	0.00449425
genus_Spirosoma	0.0625028	fisher	0	2.08333e-08	0.110539
genus_Sporacetigenium	0.0069986	wilcox.test	0.00161555	0.00079324	0.0167034
genus_Sporolactobacillus	1	fisher	0	4.16667e-09	0.837575
genus_Staphylococcus	0.00019996	wilcox.test	5.08884e-06	4.60344e-06	0.000805833
genus_Stenotrophomonas	0.343761	fisher	1.35645e-08	2.91667e-08	0.437856
genus_Streptococcus	0.00019996	wilcox.test	0.011808	0.00361018	0.000805833
genus_Subdoligranulum	0.00019996	wilcox.test	0.0585372	0.0287208	0.000805833
genus_Succinivibrio	0.00019996	wilcox.test	0.000583122	1.93458e-05	0.000805833
genus_Sutterella	0.00439912	wilcox.test	1.33664e-06	1.17093e-05	0.010979
genus_Syntrophococcus	0.343761	fisher	1.25e-08	2.91667e-08	0.437856
genus_Tannerella	0.124203	fisher	1.25e-08	0	0.189061
genus_Tepidimonas	0.498935	fisher	4.16667e-09	0	0.524157
genus_Terribacillus	1	fisher	0	4.16667e-09	0.837575
genus_Tetrathiobacter	1	fisher	0	4.16667e-09	0.837575
genus_Thermicanus	0.498935	fisher	4.16667e-09	0	0.524157
genus_Thermoactinomyces	0.498935	fisher	4.16667e-09	0	0.524157
genus_Thermoanaerobacterium	0.0619693	fisher	1.92492e-08	0	0.11039
genus_Thermus	0.00039992	wilcox.test	8.63104e-07	2.91913e-07	0.00143521
genus_Treponema	1.24906e-06	fisher	4.24124e-08	1.91667e-07	3.23215e-05
genus_Trichococcus	0.265828	fisher	3.35565e-08	1.66667e-08	0.350811
genus_Tropheryma	0.624203	fisher	8.33333e-09	4.16667e-09	0.624567
genus_Truepera	0.500002	fisher	0	8.33333e-09	0.524157
genus_Tsukamurella	2.82795e-05	fisher	2.13488e-07	7.08333e-08	0.000534762
genus_Turicella	0.125003	fisher	0	1.66667e-08	0.189104
genus_Turicibacter	0.0105979	wilcox.test	0.00233761	0.00152088	0.023577
genus_Ureaplasma	0.125003	fisher	0	1.66667e-08	0.189104
genus_Ureibacillus	1	fisher	0	4.16667e-09	0.837575
genus_Vagococcus	0.498935	fisher	4.16667e-09	0	0.524157
genus_Varibaculum	0.205359	wilcox.test	1.80238e-06	1.24559e-06	0.290969
genus_Variovorax	0.0038402	fisher	3.33333e-08	0	0.00973226
genus_Veillonella	0.511698	wilcox.test	0.00116218	0.000791268	0.533008
genus_Victivallis	0.00019996	wilcox.test	8.17543e-06	0.000154967	0.000805833
genus_Viridibacillus	0.124203	fisher	1.25e-08	0	0.189061
genus_Vitellibacter	0.500002	fisher	0	8.33333e-09	0.524157
genus_Vitreoscilla	1	fisher	0	4.16667e-09	0.837575
genus_Weissella	0.0019996	wilcox.test	1.0216e-05	9.0875e-06	0.00543158
genus_Yaniella	0.500002	fisher	0	8.33333e-09	0.524157
genus_Yersinia	0.00335631	fisher	4.58333e-08	4.16667e-09	0.00870468

## Sheet: legend
Table S3: Paired metastats results (paired Wilcoxon rank sum test). This table contains raw P values for each taxa tested (by paired-metastats test, see methods), q-value, and average winter and summer abundances of each taxa tested.
