# Supplementary material for: Seasonal Variation in Human Gut Microbiome Composition
Source: PLoS One. 2014 Mar 11;9(3):e90731. doi: 10.1371/journal.pone.0090731 (PMC3949691; doi:10.1371/journal.pone.0090731)
Supplement: Table S7 — Differential abundance results of predicted metagenome KEGG categories. This table contains raw P values (from paired Wilcoxon rank sum test), the mean winter and summer abundances, and q-values for each predicted KEGG pathway category tested. (XLSX) [file pone.0090731.s017.xlsx]

## Sheet: table
Table S7: Differential abundance results of predicted metagenome KEGG categories
KEGG_level	KEGG	pvalue	mean(winter)	mean(summer)	qvals
KEGG1	Cellular Processes	0.00849406	0.030725	0.0328143	0.00766176
KEGG1	Environmental Information Processing	1.57749e-05	0.146915	0.138307	4.45669e-05
KEGG1	Genetic Information Processing	0.909155	0.201333	0.201397	0.417582
KEGG1	Human Diseases	1.37996e-05	0.00668686	0.00692101	4.13254e-05
KEGG1	Metabolism	0.00036151	0.468	0.473048	0.000563859
KEGG1	Organismal Systems	9.19161e-06	0.00705284	0.00757235	3.03002e-05
KEGG1	Unclassified	0.415956	0.139288	0.139941	0.223236
KEGG2	Amino Acid Metabolism	0.0464464	0.0971936	0.0965787	0.0337603
KEGG2	Biosynthesis of Other Secondary Metabolites	0.000305176	0.00907688	0.00943351	0.000513431
KEGG2	Cancers	3.8484e-06	0.000940463	0.00101247	1.74618e-05
KEGG2	Carbohydrate Metabolism	0.249284	0.106378	0.105587	0.147535
KEGG2	Cardiovascular Diseases	0.00257338	4.34966e-07	1.57996e-06	0.0027328
KEGG2	Cell Growth and Death	0.098396	0.00502598	0.00509485	0.0651915
KEGG2	Cell Motility	0.0324725	0.0236165	0.0251264	0.0244334
KEGG2	Cellular Processes and Signaling	3.10762e-06	0.0406734	0.0417057	1.50103e-05
KEGG2	Circulatory System	0.00106702	1.68672e-06	5.25226e-06	0.0013426
KEGG2	Digestive System	1.427e-05	0.000230876	0.000396092	4.18963e-05
KEGG2	Endocrine System	4.46481e-05	0.00291475	0.00312489	9.15802e-05
KEGG2	Energy Metabolism	0.415956	0.0583296	0.0587097	0.223236
KEGG2	Environmental Adaptation	0.02184	0.00178811	0.00184134	0.0173026
KEGG2	Enzyme Families	5.74332e-05	0.0214958	0.0219355	0.000113154
KEGG2	Excretory System	0.318523	0.00017442	0.000188189	0.181346
KEGG2	Folding, Sorting and Degradation	1.44161e-07	0.0238122	0.0246039	3.04674e-06
KEGG2	Genetic Information Processing	0.0506415	0.0254012	0.0250601	0.0361084
KEGG2	Glycan Biosynthesis and Metabolism	1.07678e-06	0.0187739	0.022135	7.67764e-06
KEGG2	Immune System	5.22783e-05	0.000868963	0.000920831	0.000104371
KEGG2	Immune System Diseases	0.00084236	0.000468918	0.000509833	0.00109678
KEGG2	Infectious Diseases	0.033074	0.0035271	0.00358807	0.0247616
KEGG2	Lipid Metabolism	0.1608	0.0286463	0.0288462	0.101165
KEGG2	Membrane Transport	3.98728e-06	0.129823	0.120654	1.75598e-05
KEGG2	Metabolic Diseases	0.0480879	0.000989953	0.00100823	0.0347846
KEGG2	Metabolism	0.0803981	0.0255091	0.0253028	0.0544722
KEGG2	Metabolism of Cofactors and Vitamins	0.000578393	0.0430108	0.0438283	0.000801901
KEGG2	Metabolism of Other Amino Acids	2.94459e-05	0.0136057	0.0140934	6.78318e-05
KEGG2	Metabolism of Terpenoids and Polyketides	0.000127253	0.0158241	0.0162706	0.000229569
KEGG2	Nervous System	0.0730449	0.00107403	0.00109576	0.0499421
KEGG2	Neurodegenerative Diseases	0.0883417	0.000759986	0.000800819	0.0595846
KEGG2	Nucleotide Metabolism	0.367165	0.0397483	0.04016	0.204376
KEGG2	Poorly Characterized	0.415956	0.0477044	0.0478728	0.223236
KEGG2	Replication and Repair	0.318523	0.0889286	0.0895824	0.181346
KEGG2	Signal Transduction	0.0506415	0.0156066	0.0160403	0.0361084
KEGG2	Signaling Molecules and Interaction	0.00106702	0.00148511	0.00161248	0.0013426
KEGG2	Transcription	2.85077e-05	0.0304503	0.0294804	6.77552e-05
KEGG2	Translation	0.336708	0.0581418	0.0577298	0.190252
KEGG2	Transport and Catabolism	3.71154e-07	0.00208249	0.00259299	3.66181e-06
KEGG2	Xenobiotics Biodegradation and Metabolism	0.0245144	0.0159165	0.0154701	0.0189209
KEGG3	1,1,1-Trichloro-2,2-bis(4-chlorophenyl)ethane (DDT) degradation	0.00036151	2.16032e-06	4.8457e-06	0.000563859
KEGG3	ABC transporters	9.5109e-06	0.035175	0.0323876	3.03002e-05
KEGG3	Adipocytokine signaling pathway	2.34481e-05	0.000513937	0.000622559	5.85165e-05
KEGG3	African trypanosomiasis	0.00112395	3.33759e-05	2.16966e-05	0.00139085
KEGG3	Alanine, aspartate and glutamate metabolism	0.000181565	0.0105034	0.0107699	0.000316122
KEGG3	Aldosterone-regulated sodium reabsorption	0.000309609	1.03264e-09	3.70938e-09	0.000515102
KEGG3	alpha-Linolenic acid metabolism	4.92694e-06	7.67506e-06	1.54667e-05	1.99387e-05
KEGG3	Alzheimer's disease	0.137978	0.000486619	0.000495018	0.0882908
KEGG3	Amino acid metabolism	0.025955	0.00200686	0.00189871	0.0198283
KEGG3	Amino acid related enzymes	0.732114	0.0149923	0.0149924	0.358244
KEGG3	Amino sugar and nucleotide sugar metabolism	3.93173e-05	0.0139958	0.0144309	8.41022e-05
KEGG3	Aminoacyl-tRNA biosynthesis	0.00454117	0.0125129	0.0122142	0.00447348
KEGG3	Aminobenzoate degradation	0.0222673	0.000946513	0.0010123	0.0174564
KEGG3	Amoebiasis	0.0969061	0.000109983	9.81095e-05	0.0650681
KEGG3	Amyotrophic lateral sclerosis (ALS)	0.344166	7.15306e-05	7.67078e-05	0.193735
KEGG3	Antigen processing and presentation	3.80823e-05	0.000418681	0.000444159	8.38563e-05
KEGG3	Apoptosis	0.287441	4.6963e-06	5.11887e-06	0.16747
KEGG3	Arachidonic acid metabolism	2.75979e-05	0.00013918	0.000240494	6.66508e-05
KEGG3	Arginine and proline metabolism	0.0194231	0.012591	0.0123317	0.015806
KEGG3	Ascorbate and aldarate metabolism	0.00610297	0.00103444	0.000950415	0.0057114
KEGG3	Atrazine degradation	0.0264511	0.000246882	0.000208203	0.0201048
KEGG3	Bacterial chemotaxis	0.0506415	0.00512849	0.0054075	0.0361084
KEGG3	Bacterial invasion of epithelial cells	0.0662512	4.54718e-06	4.39218e-06	0.04614
KEGG3	Bacterial motility proteins	0.0146722	0.0100024	0.0109225	0.0123423
KEGG3	Bacterial secretion system	0.743221	0.00560032	0.00564184	0.362494
KEGG3	Bacterial toxins	0.00570482	0.00121563	0.00116601	0.00540638
KEGG3	Basal transcription factors	0.355548	2.34106e-05	1.20026e-05	0.198649
KEGG3	Base excision repair	0.00795773	0.00444853	0.00435632	0.00726553
KEGG3	Benzoate degradation	0.000737366	0.00208825	0.00196467	0.000977072
KEGG3	beta-Alanine metabolism	0.00475506	0.00173866	0.00181527	0.00462336
KEGG3	beta-Lactam resistance	0.0410678	0.000300343	0.000272576	0.0302919
KEGG3	Betalain biosynthesis	0.077883	1.58586e-07	2.16314e-07	0.053008
KEGG3	Bile secretion	0.00596756	5.75417e-06	2.85356e-06	0.0056198
KEGG3	Biosynthesis and biodegradation of secondary metabolites	0.017591	0.000564572	0.000528371	0.0143933
KEGG3	Biosynthesis of 12-, 14- and 16-membered macrolides	0.286235	1.56666e-10	6.79022e-11	0.167419
KEGG3	Biosynthesis of ansamycins	0.446104	0.00133353	0.00130972	0.237712
KEGG3	Biosynthesis of siderophore group nonribosomal peptides	2.26927e-05	0.00015874	0.000211306	5.75912e-05
KEGG3	Biosynthesis of type II polyketide backbone	0.371093	0	2.81924e-11	0.205039
KEGG3	Biosynthesis of type II polyketide products	0.00423664	1.2624e-07	5.67204e-08	0.00420113
KEGG3	Biosynthesis of unsaturated fatty acids	0.548526	0.00118407	0.00120043	0.284198
KEGG3	Biosynthesis of vancomycin group antibiotics	0.00368249	0.000593956	0.000636545	0.00372564
KEGG3	Biotin metabolism	0.693695	0.00156081	0.00155194	0.342805
KEGG3	Bisphenol degradation	0.505267	0.000865845	0.000851946	0.263609
KEGG3	Bladder cancer	0.95597	2.82743e-06	3.08861e-06	0.431149
KEGG3	Butanoate metabolism	0.0707196	0.00601396	0.0058975	0.048798
KEGG3	Butirosin and neomycin biosynthesis	0.0418023	0.000751931	0.000771651	0.0305329
KEGG3	C5-Branched dibasic acid metabolism	2.51202e-07	0.00346268	0.00324595	3.66181e-06
KEGG3	Caffeine metabolism	0.845328	1.27813e-05	1.38678e-05	0.398034
KEGG3	Calcium signaling pathway	0.754381	2.21995e-07	2.52117e-07	0.365556
KEGG3	Caprolactam degradation	0.152192	0.000185823	0.000164907	0.0969718
KEGG3	Carbohydrate digestion and absorption	0.00987311	0.000114059	0.000139049	0.0087476
KEGG3	Carbohydrate metabolism	0.634913	0.00196445	0.0019278	0.320095
KEGG3	Carbon fixation in photosynthetic organisms	0.00061068	0.00658933	0.00677549	0.000838897
KEGG3	Carbon fixation pathways in prokaryotes	0.00509303	0.00916648	0.0095651	0.00488848
KEGG3	Cardiac muscle contraction	0.00106702	1.68672e-06	5.25226e-06	0.0013426
KEGG3	Carotenoid biosynthesis	0.201518	5.45982e-05	4.60513e-05	0.12167
KEGG3	Cell cycle	0.000490816	5.74534e-06	2.80748e-06	0.000713515
KEGG3	Cell cycle - Caulobacter	0.134111	0.00498187	0.0050442	0.0865561
KEGG3	Cell division	0.307927	0.000716231	0.000730045	0.177336
KEGG3	Cell motility and secretion	0.00335057	0.00149041	0.00165036	0.00343627
KEGG3	Cellular antigens	1.83129e-07	0.000158535	0.000338524	3.04674e-06
KEGG3	Chagas disease (American trypanosomiasis)	0.15431	1.96431e-05	1.71173e-05	0.0974919
KEGG3	Chaperones and folding catalysts	1.62519e-07	0.00956971	0.010171	3.04674e-06
KEGG3	Chloroalkane and chloroalkene degradation	3.71417e-06	0.00201567	0.00177495	1.73794e-05
KEGG3	Chlorocyclohexane and chlorobenzene degradation	0.00946005	0.000125851	0.000104202	0.00843152
KEGG3	Chromosome	0.00177805	0.0158485	0.0161768	0.00201693
KEGG3	Chronic myeloid leukemia	0.0214325	3.70523e-08	6.79845e-09	0.0170701
KEGG3	Circadian rhythm - plant	0.83957	1.27846e-05	1.38709e-05	0.396569
KEGG3	Citrate cycle (TCA cycle)	0.00036151	0.00494449	0.00553782	0.000563859
KEGG3	Clavulanic acid biosynthesis	0.571289	6.77549e-11	2.9299e-10	0.291951
KEGG3	Colorectal cancer	0.00257338	4.34204e-07	1.57919e-06	0.0027328
KEGG3	Cyanoamino acid metabolism	0.00311977	0.00283087	0.00301068	0.00322163
KEGG3	Cysteine and methionine metabolism	0.682856	0.00967064	0.00969407	0.338566
KEGG3	Cytochrome P450	0.00226602	5.88074e-10	3.44999e-10	0.00249486
KEGG3	Cytoskeleton proteins	0.00109514	0.00440399	0.00419895	0.0013665
KEGG3	D-Alanine metabolism	0.098396	0.00101607	0.000999432	0.0651915
KEGG3	D-Arginine and D-ornithine metabolism	0.121233	2.48172e-05	2.54589e-05	0.0789253
KEGG3	D-Glutamine and D-glutamate metabolism	0.0609955	0.001428	0.00145378	0.0426782
KEGG3	Dioxin degradation	1.63093e-05	0.000669068	0.000570292	4.50834e-05
KEGG3	DNA repair and recombination proteins	0.903322	0.0281888	0.0282471	0.417464
KEGG3	DNA replication	0.45051	0.00649562	0.00654653	0.239209
KEGG3	DNA replication proteins	0.15431	0.0122544	0.0124217	0.0974919
KEGG3	Drug metabolism - cytochrome P450	0.379016	0.000220248	0.000208382	0.207882
KEGG3	Drug metabolism - other enzymes	0.00728986	0.00309041	0.00321131	0.00669659
KEGG3	Electron transfer carriers	2.50472e-06	0.000297418	0.000174169	1.29325e-05
KEGG3	Endocrine and other factor-regulated calcium reabsorption	4.15742e-07	6.54311e-10	3.58371e-09	3.66181e-06
KEGG3	Endocytosis	0.181506	2.21757e-09	2.80976e-09	0.111843
KEGG3	Energy metabolism	0.00290355	0.00847466	0.00872784	0.00304029
KEGG3	Epithelial cell signaling in Helicobacter pylori infection	0.0222673	0.000990285	0.000963706	0.0174564
KEGG3	Ether lipid metabolism	0.00222265	1.82889e-05	1.31138e-05	0.00246524
KEGG3	Ethylbenzene degradation	0.000680345	0.000275479	0.000323703	0.000909563
KEGG3	Fat digestion and absorption	1	0	4.395e-12	0.440395
KEGG3	Fatty acid biosynthesis	0.379016	0.0047817	0.00472164	0.207882
KEGG3	Fatty acid elongation in mitochondria	0.868443	1.27821e-05	1.38706e-05	0.405096
KEGG3	Fatty acid metabolism	0.0152811	0.0021237	0.00206275	0.0127827
KEGG3	Fc gamma R-mediated phagocytosis	0.186365	2.21757e-09	2.81415e-09	0.113899
KEGG3	Flagellar assembly	0.0127061	0.00408165	0.0045975	0.0108099
KEGG3	Flavone and flavonol biosynthesis	0.0245144	3.17551e-05	3.81625e-05	0.0189209
KEGG3	Flavonoid biosynthesis	0.179113	7.37745e-05	6.25151e-05	0.111747
KEGG3	Fluorobenzoate degradation	0.533905	2.82429e-05	3.22889e-05	0.277583
KEGG3	Folate biosynthesis	0.0673459	0.00346686	0.00362685	0.0466852
KEGG3	Fructose and mannose metabolism	0.249284	0.0101375	0.00997041	0.147535
KEGG3	Function unknown	0.284119	0.0121276	0.0120191	0.166833
KEGG3	G protein-coupled receptors	0.025955	6.00635e-07	4.65212e-07	0.0198283
KEGG3	Galactose metabolism	0.950106	0.00801746	0.00799688	0.431102
KEGG3	Gastric acid secretion	4.15742e-07	6.54311e-10	3.58371e-09	3.66181e-06
KEGG3	General function prediction only	0.0551494	0.0355768	0.0358537	0.0391363
KEGG3	Geraniol degradation	9.12729e-05	0.000203006	0.000286495	0.000172996
KEGG3	Germination	3.80823e-05	0.000567202	0.000493824	8.38563e-05
KEGG3	Glutamatergic synapse	0.0730449	0.00107403	0.00109576	0.0499421
KEGG3	Glutathione metabolism	7.13961e-05	0.00152244	0.00167822	0.000138837
KEGG3	Glycan bindng proteins	1	0	1.68509e-11	0.440395
KEGG3	Glycan biosynthesis and metabolism	0.00533025	0.000189271	0.000235478	0.00508358
KEGG3	Glycerolipid metabolism	7.48057e-06	0.00450513	0.0041453	2.60488e-05
KEGG3	Glycerophospholipid metabolism	0.284119	0.00599561	0.00592194	0.166833
KEGG3	Glycine, serine and threonine metabolism	0.00475506	0.00790514	0.00806658	0.00462336
KEGG3	Glycolysis / Gluconeogenesis	0.000757339	0.0114911	0.0112389	0.000994734
KEGG3	Glycosaminoglycan biosynthesis - chondroitin sulfate	0.789268	6.19266e-12	1.75484e-11	0.378784
KEGG3	Glycosaminoglycan degradation	1.50322e-06	0.000394855	0.000692089	1.00944e-05
KEGG3	Glycosphingolipid biosynthesis - ganglio series	1.08788e-07	0.000228336	0.000471949	3.04674e-06
KEGG3	Glycosphingolipid biosynthesis - globo series	1.50045e-07	0.000975718	0.00123028	3.04674e-06
KEGG3	Glycosphingolipid biosynthesis - lacto and neolacto series	4.92694e-06	1.798e-06	4.26495e-06	1.99387e-05
KEGG3	Glycosylphosphatidylinositol(GPI)-anchor biosynthesis	0.371093	0	1.8505e-11	0.205039
KEGG3	Glycosyltransferases	5.28482e-06	0.00308951	0.0033985	2.02902e-05
KEGG3	Glyoxylate and dicarboxylate metabolism	0.944245	0.00517859	0.00517127	0.431102
KEGG3	GnRH signaling pathway	0.181506	2.21757e-09	2.80976e-09	0.111843
KEGG3	Hematopoietic cell lineage	0.294507	9.456e-11	7.32273e-11	0.170262
KEGG3	Hepatitis C	0.000490816	5.74534e-06	2.80748e-06	0.000713515
KEGG3	Histidine metabolism	0.593538	0.00635876	0.00631799	0.302289
KEGG3	Homologous recombination	0.223093	0.00925216	0.00934852	0.133619
KEGG3	Huntington's disease	0.0206007	0.000156556	0.000183545	0.0166737
KEGG3	Hypertrophic cardiomyopathy (HCM)	0.00618048	7.61594e-10	7.70861e-10	0.00574802
KEGG3	Indole alkaloid biosynthesis	2.79059e-06	7.42351e-08	1.69786e-07	1.39282e-05
KEGG3	Influenza A	0.828078	6.17954e-06	4.38667e-06	0.394878
KEGG3	Inorganic ion transport and metabolism	0.0155938	0.00182541	0.00194947	0.0129718
KEGG3	Inositol phosphate metabolism	0.961835	0.000901234	0.000895701	0.43241
KEGG3	Insulin signaling pathway	0.650737	0.00102241	0.00102173	0.325879
KEGG3	Ion channels	0.619254	0.000110344	0.000107482	0.313255
KEGG3	Isoflavonoid biosynthesis	0.293837	2.95674e-10	2.81837e-10	0.170262
KEGG3	Isoquinoline alkaloid biosynthesis	7.74284e-06	0.000462444	0.00053312	2.63493e-05
KEGG3	Leishmaniasis	0.00051854	2.99811e-10	2.88591e-10	0.000732484
KEGG3	Limonene and pinene degradation	0.891671	0.000709256	0.000705108	0.413356
KEGG3	Linoleic acid metabolism	0.558381	0.000700018	0.000689906	0.286332
KEGG3	Lipid biosynthesis proteins	0.000518532	0.00572011	0.00590088	0.000732484
KEGG3	Lipid metabolism	0.00191624	0.00157231	0.00151056	0.00215735
KEGG3	Lipoic acid metabolism	7.59409e-05	0.000144817	0.000202695	0.000145782
KEGG3	Lipopolysaccharide biosynthesis	1.74304e-05	0.00118979	0.00194028	4.57882e-05
KEGG3	Lipopolysaccharide biosynthesis proteins	1.6861e-05	0.00197829	0.00280853	4.50834e-05
KEGG3	Lysine biosynthesis	1.6861e-05	0.00900109	0.00865525	4.50834e-05
KEGG3	Lysine degradation	0.186365	0.00112098	0.00114897	0.113899
KEGG3	Lysosome	2.167e-06	0.00069678	0.00105638	1.24798e-05
KEGG3	MAPK signaling pathway - yeast	0.765593	0.000368304	0.000373488	0.368603
KEGG3	Measles	0.000490816	5.74534e-06	2.80748e-06	0.000713515
KEGG3	Meiosis - yeast	0.136034	3.32381e-05	4.11454e-05	0.0874204
KEGG3	Melanogenesis	0.00152875	8.42951e-08	4.65101e-08	0.00176082
KEGG3	Membrane and intracellular structural molecules	1.33054e-07	0.00381121	0.00485344	3.04674e-06
KEGG3	Metabolism of cofactors and vitamins	0.0116906	0.00109602	0.00103027	0.0101772
KEGG3	Metabolism of xenobiotics by cytochrome P450	0.415956	0.000202033	0.000190224	0.223236
KEGG3	Methane metabolism	9.70029e-05	0.0136619	0.0128196	0.000181558
KEGG3	Mineral absorption	0.0162362	4.43106e-05	6.64981e-05	0.0134316
KEGG3	Mismatch repair	0.656047	0.00832908	0.00835852	0.326355
KEGG3	mRNA surveillance pathway	0.000490816	1.14908e-05	5.61528e-06	0.000713515
KEGG3	mTOR signaling pathway	0.000490816	5.74534e-06	2.80748e-06	0.000713515
KEGG3	N-Glycan biosynthesis	0.00359682	0.000180363	0.000222109	0.00366372
KEGG3	Naphthalene degradation	0.833819	0.00129686	0.00129929	0.3951
KEGG3	Nicotinate and nicotinamide metabolism	0.017591	0.00423693	0.00432713	0.0143933
KEGG3	Nitrogen metabolism	0.0119375	0.00659335	0.00678739	0.0103321
KEGG3	Nitrotoluene degradation	0.000578393	0.000993265	0.000863716	0.000801901
KEGG3	NOD-like receptor signaling pathway	5.66751e-06	0.000428447	0.000464143	2.12155e-05
KEGG3	Non-homologous end-joining	0.16524	0.000116216	9.83443e-05	0.103523
KEGG3	Notch signaling pathway	0.0214325	3.70523e-08	6.79845e-09	0.0170701
KEGG3	Novobiocin biosynthesis	0.891671	0.00132928	0.00133007	0.413356
KEGG3	Nucleotide excision repair	0.424445	0.00399525	0.0040286	0.226979
KEGG3	Nucleotide metabolism	0.0105229	0.000448688	0.000422245	0.00921423
KEGG3	One carbon pool by folate	4.13095e-06	0.00601595	0.00639698	1.76727e-05
KEGG3	Other glycan degradation	1.75993e-07	0.00245092	0.00306463	3.04674e-06
KEGG3	Other ion-coupled transporters	0.000210088	0.0120266	0.0125133	0.000361579
KEGG3	Other transporters	0.868443	0.00269345	0.00268464	0.405096
KEGG3	Others	0.012189	0.00919227	0.00902157	0.0104292
KEGG3	Oxidative phosphorylation	0.11602	0.0107224	0.0109866	0.0761936
KEGG3	p53 signaling pathway	0.00239214	4.34717e-07	1.58006e-06	0.0026145
KEGG3	Pancreatic secretion	4.15742e-07	6.54311e-10	3.58371e-09	3.66181e-06
KEGG3	Pantothenate and CoA biosynthesis	0.0368868	0.00663168	0.00656098	0.0273427
KEGG3	Parkinson's disease	0.00138089	2.14408e-06	6.85188e-06	0.00162808
KEGG3	Pathogenic Escherichia coli infection	0.12055	3.88692e-09	5.03167e-09	0.078823
KEGG3	Pathways in cancer	9.5109e-06	0.000465373	0.000497064	3.03002e-05
KEGG3	Penicillin and cephalosporin biosynthesis	0.950106	0.000183084	0.000188673	0.431102
KEGG3	Pentose and glucuronate interconversions	0.220309	0.0052575	0.00515404	0.132481
KEGG3	Pentose phosphate pathway	0.00141656	0.00932866	0.00905449	0.00164425
KEGG3	Peptidases	4.46481e-05	0.0183479	0.0188913	9.15802e-05
KEGG3	Peptidoglycan biosynthesis	0.868443	0.00827679	0.00829629	0.405096
KEGG3	Peroxisome	9.62537e-07	0.00137996	0.00153379	7.20625e-06
KEGG3	Pertussis	2.41584e-06	6.19555e-05	0.000120067	1.29325e-05
KEGG3	Phagosome	0.000490816	5.74534e-06	2.80748e-06	0.000713515
KEGG3	Phenylalanine metabolism	0.00886934	0.00172888	0.00179237	0.00795237
KEGG3	Phenylalanine, tyrosine and tryptophan biosynthesis	0.198932	0.00910064	0.0089938	0.120595
KEGG3	Phenylpropanoid biosynthesis	0.0570439	0.00171261	0.00180639	0.0401006
KEGG3	Phosphatidylinositol signaling system	0.558381	0.000838408	0.000849272	0.286332
KEGG3	Phosphonate and phosphinate metabolism	0.656047	0.000483396	0.000476863	0.326355
KEGG3	Phosphotransferase system (PTS)	0.00017121	0.00481047	0.00409938	0.0003016
KEGG3	Photosynthesis	0.909155	0.00437651	0.00436025	0.417582
KEGG3	Photosynthesis - antenna proteins	0.765593	3.76778e-06	4.28082e-06	0.368603
KEGG3	Photosynthesis proteins	0.95597	0.00439739	0.00439344	0.431149
KEGG3	Plant-pathogen interaction	0.0368868	0.00177533	0.00182747	0.0273427
KEGG3	Polycyclic aromatic hydrocarbon degradation	0.333019	0.00112092	0.00112669	0.18888
KEGG3	Polyketide sugar unit biosynthesis	0.000888114	0.00203182	0.00213056	0.00114639
KEGG3	Pores ion channels	8.52889e-08	0.002278	0.00301663	3.04674e-06
KEGG3	Porphyrin and chlorophyll metabolism	0.00395075	0.0103898	0.00984492	0.00397022
KEGG3	PPAR signaling pathway	1.08973e-05	0.000959564	0.00103623	3.32999e-05
KEGG3	Prenyltransferases	1.05336e-05	0.00289921	0.00313167	3.28593e-05
KEGG3	Primary bile acid biosynthesis	0.482035	0.00038197	0.000382051	0.254145
KEGG3	Primary immunodeficiency	0.00813304	0.000456051	0.000495914	0.00738058
KEGG3	Prion diseases	0.0418023	4.31358e-05	3.86963e-05	0.0305329
KEGG3	Progesterone-mediated oocyte maturation	3.80823e-05	0.000418681	0.000444159	8.38563e-05
KEGG3	Propanoate metabolism	3.93173e-05	0.0049797	0.00472657	8.41022e-05
KEGG3	Prostate cancer	7.48057e-06	0.000425136	0.000457836	2.60488e-05
KEGG3	Proteasome	0.181506	0.000448354	0.00045611	0.111843
KEGG3	Protein digestion and absorption	2.71714e-07	6.6751e-05	0.00018768	3.66181e-06
KEGG3	Protein export	0.012189	0.00583699	0.00592492	0.0104292
KEGG3	Protein folding and associated processing	0.699138	0.00603045	0.00608867	0.344359
KEGG3	Protein kinases	0.0143758	0.00314792	0.0030442	0.0121613
KEGG3	Protein processing in endoplasmic reticulum	0.00032297	0.00061121	0.00068336	0.000531426
KEGG3	Proximal tubule bicarbonate reclamation	0.318523	0.000174418	0.000188182	0.181346
KEGG3	Purine metabolism	0.463876	0.021664	0.0218593	0.245435
KEGG3	Pyrimidine metabolism	0.237389	0.0180844	0.0183006	0.141615
KEGG3	Pyruvate metabolism	0.000644638	0.0106444	0.0102853	0.000869589
KEGG3	Renal cell carcinoma	0.098396	4.62208e-05	5.13186e-05	0.0651915
KEGG3	Renin-angiotensin system	0.00141656	7.23152e-08	1.58043e-07	0.00164425
KEGG3	Replication, recombination and repair proteins	2.94459e-05	0.00827928	0.00778649	6.78318e-05
KEGG3	Restriction enzyme	0.00127877	0.00180556	0.00194953	0.00151965
KEGG3	Retinol metabolism	0.0245144	0.000212768	0.000240709	0.0189209
KEGG3	Riboflavin metabolism	3.3032e-07	0.00211805	0.00238399	3.66181e-06
KEGG3	Ribosome	1	0.0236437	0.0236724	0.440395
KEGG3	Ribosome Biogenesis	0.553443	0.0144974	0.0144443	0.285757
KEGG3	Ribosome biogenesis in eukaryotes	0.19132	0.000521667	0.000497221	0.116452
KEGG3	RIG-I-like receptor signaling pathway	2.167e-06	2.18331e-05	1.25256e-05	1.24798e-05
KEGG3	RNA degradation	4.60841e-05	0.00448393	0.00464422	9.32484e-05
KEGG3	RNA polymerase	0.00118367	0.00171571	0.00163439	0.00142932
KEGG3	RNA transport	0.000332227	0.00167113	0.00156055	0.000534902
KEGG3	Salivary secretion	4.15742e-07	6.54311e-10	3.58371e-09	3.66181e-06
KEGG3	Secondary bile acid biosynthesis	0.505267	0.000380221	0.000379539	0.263609
KEGG3	Secretion system	0.415956	0.0117516	0.0118244	0.223236
KEGG3	Selenocompound metabolism	0.833819	0.00361021	0.00362	0.3951
KEGG3	Sesquiterpenoid biosynthesis	1	2.87881e-12	0	0.440395
KEGG3	Shigellosis	7.97596e-07	3.33707e-08	4.44793e-07	6.28566e-06
KEGG3	Signal transduction mechanisms	1.47557e-05	0.00497755	0.00468457	4.24893e-05
KEGG3	Small cell lung cancer	0.0027671	4.34504e-07	1.57947e-06	0.00291782
KEGG3	Sphingolipid metabolism	1.61797e-06	0.00221141	0.00256477	1.00944e-05
KEGG3	Spliceosome	1	9.69805e-12	1.03093e-11	0.440395
KEGG3	Sporulation	0.000464487	0.00998988	0.00895532	0.000713515
KEGG3	Staphylococcus aureus infection	3.79331e-09	4.46921e-05	2.00907e-05	5.67989e-07
KEGG3	Starch and sucrose metabolism	0.748794	0.0109906	0.0110305	0.364027
KEGG3	Steroid biosynthesis	0.979444	3.89214e-05	4.21928e-05	0.437781
KEGG3	Steroid hormone biosynthesis	2.67157e-05	0.000123367	0.000221074	6.55781e-05
KEGG3	Stilbenoid, diarylheptanoid and gingerol biosynthesis	0.950106	6.65941e-06	6.76104e-06	0.431102
KEGG3	Streptomycin biosynthesis	0.00115345	0.00310841	0.00325689	0.00140416
KEGG3	Styrene degradation	0.0103022	0.000222328	0.000191775	0.00907405
KEGG3	Sulfur metabolism	0.000119848	0.00281854	0.00301759	0.000218845
KEGG3	Sulfur relay system	0.00173406	0.00282716	0.0026732	0.00198205
KEGG3	Synthesis and degradation of ketone bodies	0.64017	0.000322169	0.000330735	0.321662
KEGG3	Systemic lupus erythematosus	0.721064	1.28669e-05	1.39183e-05	0.353994
KEGG3	Taurine and hypotaurine metabolism	0.00017121	0.000951202	0.00101368	0.0003016
KEGG3	Terpenoid backbone biosynthesis	0.00413932	0.00577184	0.00590175	0.00413199
KEGG3	Tetracycline biosynthesis	5.45515e-07	0.00158681	0.00136796	4.53791e-06
KEGG3	Thiamine metabolism	0.112643	0.0053678	0.00530088	0.0743018
KEGG3	Toluene degradation	0.0324725	0.000664963	0.000806207	0.0244334
KEGG3	Toxoplasmosis	0.00257338	4.34204e-07	1.57919e-06	0.0027328
KEGG3	Transcription factors	2.26927e-05	0.018442	0.0172458	5.75912e-05
KEGG3	Transcription machinery	0.000264625	0.0102692	0.0105882	0.000450266
KEGG3	Transcription related proteins	0.00697517	0.000104031	7.88205e-05	0.00644705
KEGG3	Translation factors	0.403413	0.00528351	0.00533552	0.220455
KEGG3	Translation proteins	0.347934	0.00918192	0.00915656	0.195122
KEGG3	Transporters	2.50472e-06	0.0724854	0.0667008	1.29325e-05
KEGG3	Tropane, piperidine and pyridine alkaloid biosynthesis	0.000332227	0.00110358	0.00115245	0.000534902
KEGG3	Tryptophan metabolism	0.134111	0.00118087	0.00114263	0.0865561
KEGG3	Tuberculosis	0.00201378	0.00157267	0.00160679	0.00225024
KEGG3	Two-component system	0.05609	0.0143939	0.0148145	0.039616
KEGG3	Type I diabetes mellitus	0.00121462	0.000493936	0.000512346	0.00145496
KEGG3	Type II diabetes mellitus	0.828078	0.000496017	0.000495883	0.394878
KEGG3	Tyrosine metabolism	0.603766	0.00317812	0.00315914	0.306456
KEGG3	Ubiquinone and other terpenoid-quinone biosynthesis	5.28482e-06	0.000988311	0.00139905	2.02902e-05
KEGG3	Ubiquitin system	0.00304612	3.48713e-05	5.10508e-05	0.00316742
KEGG3	Valine, leucine and isoleucine biosynthesis	1.55958e-06	0.00809761	0.00761262	1.00944e-05
KEGG3	Valine, leucine and isoleucine degradation	0.000627445	0.00176412	0.00190138	0.000854092
KEGG3	Various types of N-glycan biosynthesis	0.500574	7.49421e-06	6.06871e-06	0.262994
KEGG3	Vasopressin-regulated water reabsorption	0.964541	4.09407e-11	3.36775e-11	0.43241
KEGG3	VEGF signaling pathway	0.00051854	2.99811e-10	2.88591e-10	0.000732484
KEGG3	Vibrio cholerae infection	0.0048654	5.76999e-06	2.86498e-06	0.00470011
KEGG3	Vibrio cholerae pathogenic cycle	0.00115345	0.00066604	0.000721205	0.00140416
KEGG3	Viral myocarditis	0.00257338	4.34204e-07	1.57919e-06	0.0027328
KEGG3	Vitamin B6 metabolism	0.000119848	0.001877	0.00199213	0.000218845
KEGG3	Wnt signaling pathway	0.0214325	3.70523e-08	6.79845e-09	0.0170701
KEGG3	Xylene degradation	4.46481e-05	0.000655697	0.000560141	9.15802e-05
KEGG3	Zeatin biosynthesis	5.86866e-06	0.000481237	0.00054341	2.14327e-05

## Sheet: Sheet1
Table S7: Differential abundance results of predicted metagenome KEGG categories. This table contains raw P values (from paired Wilcoxon rank sum test), the mean winter and summer abundances, and q-values for each predicted KEGG pathway category tested.
